# Supplementary material for: Placental Changes and Neuropsychological Development in Children—A Systematic Review
Source: MDPI journal article supplement (doi:10.3390/cells12030435), 2023-01-28
Supplement: s1 [file s1]

## Supplementary Table S1. Search strategy.

Medline (Ovid MEDLINE(R) and Epub Ahead of Print, In-Process, In-Data-Review & Other Non-Indexed Citations, Daily and Versions <1946 to May 11, 2022>)

Last run May 13, 2022

| Search terms                                  |                                                                                                                                                                                                                                                                                                                                                                                                                                                                                                                                                                                                                                                                         |  | Number of hits |
|-----------------------------------------------|-------------------------------------------------------------------------------------------------------------------------------------------------------------------------------------------------------------------------------------------------------------------------------------------------------------------------------------------------------------------------------------------------------------------------------------------------------------------------------------------------------------------------------------------------------------------------------------------------------------------------------------------------------------------------|--|----------------|
| <b>Placenta</b>                               |                                                                                                                                                                                                                                                                                                                                                                                                                                                                                                                                                                                                                                                                         |  |                |
| 1                                             | exp Placenta/ or exp Placenta Diseases/ or Pre-Eclampsia/                                                                                                                                                                                                                                                                                                                                                                                                                                                                                                                                                                                                               |  | 111,899        |
| 2                                             | (placent* or "pre eclampsia" or preeclampsia or "pregnancy toxem*" or "edema proteinuria hypertension gestosis" or "oedema proteinuria hypertension gestosis" or "toxemia of pregnancy" or "eph complex" or "eph toxemia*" or "eph gestosis" or chorioamnionit* or amnionitis or amnionitides or funisitis or funisitides).ab,kf,ti.                                                                                                                                                                                                                                                                                                                                    |  | 145,250        |
| 3                                             | 1 or 2                                                                                                                                                                                                                                                                                                                                                                                                                                                                                                                                                                                                                                                                  |  | 172,583        |
| <b>Age groups</b>                             |                                                                                                                                                                                                                                                                                                                                                                                                                                                                                                                                                                                                                                                                         |  |                |
| 4                                             | exp Child/ or Adolescent/ or Infant/                                                                                                                                                                                                                                                                                                                                                                                                                                                                                                                                                                                                                                    |  | 3,515,980      |
| 5                                             | (babies or baby or boy or boys or child* or girl* or infant* or paediatric* or pediatric* or preschool* or pre-school* or toddler* or kindergar#en* or prekindergar#en* or pre-k or offspring or kid or kids or teen* or youth* or youngster* or adolescent* or adolescence or juvenile* or minors).ab,kf,ti.                                                                                                                                                                                                                                                                                                                                                           |  | 2,542,927      |
| 6                                             | 4 or 5                                                                                                                                                                                                                                                                                                                                                                                                                                                                                                                                                                                                                                                                  |  | 4,376,421      |
| <b>Study types</b>                            |                                                                                                                                                                                                                                                                                                                                                                                                                                                                                                                                                                                                                                                                         |  |                |
| 7                                             | Cohort Studies/ or Follow-Up Studies/ or Longitudinal Studies/ or Prospective Studies/ or Retrospective Studies/ or Epidemiologic Studies/                                                                                                                                                                                                                                                                                                                                                                                                                                                                                                                              |  | 2,355,438      |
| 8                                             | (cohort* or incidence or "follow up*" or longitudinal* or prospectiv* or retrospectiv* or "case control*" or "case compar*" or "case-compeer*" or "case referrent" or "case base stud*" or epidemiolog* or (Panel* adj7 stud*) or "odds ratio*" or "relative risk*" or subcohort* or "sub cohort*" or "long term" or longterm or registry or registries or register* or "cross section*" or exposure).ab,kf,ti.                                                                                                                                                                                                                                                         |  | 5,837,094      |
| 9                                             | 7 or 8                                                                                                                                                                                                                                                                                                                                                                                                                                                                                                                                                                                                                                                                  |  | 6,389,455      |
| <b>Hypersensitivity</b>                       |                                                                                                                                                                                                                                                                                                                                                                                                                                                                                                                                                                                                                                                                         |  |                |
| 10                                            | Hypersensitivity/ or exp Hypersensitivity, Immediate/ or exp Hypersensitivity, Delayed/ or exp Bronchitis/                                                                                                                                                                                                                                                                                                                                                                                                                                                                                                                                                              |  | 340,138        |
| 11                                            | (hypersensitiv* or allergy or allergic or allergies or "airway hyper responsive*" or asthma* or bronchitis or bronchiolitis or wheeze).ab,kf,ti.                                                                                                                                                                                                                                                                                                                                                                                                                                                                                                                        |  | 413,313        |
| 12                                            | (anaphylaxis or anaphylactic or anaphylactoid or "atopic conjunctiviti*" or "vernal conjunctiviti*" or "vernal keratoconjunctiviti*" or "giant papillary conjunctiviti*" or "airway hyper-responsiveness" or "exercise-induced bronchospasm*" or pollinosis or pollinoses or "hay fever" or hayfever or urticaria* or hives or angi#edema* or "quincke's edema*" or "quincke's oedema*" or "quincke edema*" or "quincke oedema*" or "quinckes edema*" or "quinckes oedema*" or "angioneurotic edema*" or "angioneurotic oedema*" or "c1 inhibitor deficienc*" or "c1 esterase inhibitor deficienc*" or urticaria* or "atopic eczema*" or "atopic dermatitis").ab,kf,ti. |  | 85,195         |
| 13                                            | (dermatiti* adj2 (photosensitiv* or photoallerg*)).ab,kf,ti.                                                                                                                                                                                                                                                                                                                                                                                                                                                                                                                                                                                                            |  | 366            |
| 14                                            | (eosinophilic adj2 (esophagitides or esophagitis)).ab,kf,ti.                                                                                                                                                                                                                                                                                                                                                                                                                                                                                                                                                                                                            |  | 3,024          |
| 15                                            | 10 or 11 or 12 or 13 or 14                                                                                                                                                                                                                                                                                                                                                                                                                                                                                                                                                                                                                                              |  | 530,330        |
| <b>Psychiatric / psychological conditions</b> |                                                                                                                                                                                                                                                                                                                                                                                                                                                                                                                                                                                                                                                                         |  |                |
| 16                                            | Mental Disorders/ or exp Anxiety Disorders/ or exp "Bipolar and Related Disorders "/ or exp "Feeding and Eating Disorders "/ or exp                                                                                                                                                                                                                                                                                                                                                                                                                                                                                                                                     |  | 723,676        |

|                                                                             |  |                                                                                                                                                                                                                                                                                                                                                                                                                                                                                                                                                                                                                                                                                                                                                                                                                                                                                                                                                                                                                                                                                                                                                                                                                                                                                                                            |           |
|-----------------------------------------------------------------------------|--|----------------------------------------------------------------------------------------------------------------------------------------------------------------------------------------------------------------------------------------------------------------------------------------------------------------------------------------------------------------------------------------------------------------------------------------------------------------------------------------------------------------------------------------------------------------------------------------------------------------------------------------------------------------------------------------------------------------------------------------------------------------------------------------------------------------------------------------------------------------------------------------------------------------------------------------------------------------------------------------------------------------------------------------------------------------------------------------------------------------------------------------------------------------------------------------------------------------------------------------------------------------------------------------------------------------------------|-----------|
|                                                                             |  | Mood Disorders/ or exp Neurodevelopmental Disorders/ or exp "Schizophrenia Spectrum and Other Psychotic Disorders "/                                                                                                                                                                                                                                                                                                                                                                                                                                                                                                                                                                                                                                                                                                                                                                                                                                                                                                                                                                                                                                                                                                                                                                                                       |           |
| 17                                                                          |  | ((cognitive or neurocognitive) adj3 (impair* or dysfunction* or disorder* or declin*)).ab,kf,ti.                                                                                                                                                                                                                                                                                                                                                                                                                                                                                                                                                                                                                                                                                                                                                                                                                                                                                                                                                                                                                                                                                                                                                                                                                           | 138,335   |
| 18                                                                          |  | (intellectual* adj2 (disabilit* or disable*)).ab,kf,ti.                                                                                                                                                                                                                                                                                                                                                                                                                                                                                                                                                                                                                                                                                                                                                                                                                                                                                                                                                                                                                                                                                                                                                                                                                                                                    | 22,898    |
| 19                                                                          |  | ("mental disorder*" or "psychiatric illness*" or "psychiatric disease*" or "mental illness*" or "mentally ill" or "psychiatric disorder*" or "psychiatric diagnos*" or anxiety* or neurotic or neuroses or neurosis or psychoneuros* or "obsessive compulsive" or "anankastic personalit*" or hoarding or hoarder* or panic* or phobic or phobia* or claustrophobi* or bipolar* or "manic depress*" or "manic disorder*" or anorexia or bulimia or "avoidant restrictive food intake disorder*" or "food neophobia*" or arfid or "binge eating" or diabulim* or "food addict*" or "compulsive eating" or "night eating syndrome" or pica or "rumination syndrome*" or "rumination disorder*" or "mood disorder*" or "affective disorder*" or depression* or depressive or depressed or cyclothymi* or neurodevelopment* or "behavior disorder*" or "child development disorder*" or autism or autist* or asperger* or "communication disorder*" or "motor skills disorder*" or mutism or "reactive attachment disorder" or schizophren* or "stereotypic movement disorder*" or "tic disorder*" or "affective psychotic disorder*" or paranoi* or "mental deterioration" or "internali#ing symptom*" or "externali#ing symptom*" or "internali#ing disorder*" or "negative affect*" or "externali#ing disorder*").ab,kf,ti. | 1,051,987 |
| 20                                                                          |  | ((feeding or eating or appetite) adj2 disorder*).ab,kf,ti.                                                                                                                                                                                                                                                                                                                                                                                                                                                                                                                                                                                                                                                                                                                                                                                                                                                                                                                                                                                                                                                                                                                                                                                                                                                                 | 26,524    |
| 21                                                                          |  | ("attention deficit" adj4 disorder*) or "disruptive behavioral disorder*").ab,kf,ti.                                                                                                                                                                                                                                                                                                                                                                                                                                                                                                                                                                                                                                                                                                                                                                                                                                                                                                                                                                                                                                                                                                                                                                                                                                       | 31,735    |
| 22                                                                          |  | (development* adj1 (disabilit* or disorder* or deviation*)).ab,kf,ti.                                                                                                                                                                                                                                                                                                                                                                                                                                                                                                                                                                                                                                                                                                                                                                                                                                                                                                                                                                                                                                                                                                                                                                                                                                                      | 18,042    |
| 23                                                                          |  | (learning adj1 (disabilit* or disorder*)).ab,kf,ti.                                                                                                                                                                                                                                                                                                                                                                                                                                                                                                                                                                                                                                                                                                                                                                                                                                                                                                                                                                                                                                                                                                                                                                                                                                                                        | 10,146    |
| 24                                                                          |  | 16 or 17 or 18 or 19 or 20 or 21 or 22 or 23                                                                                                                                                                                                                                                                                                                                                                                                                                                                                                                                                                                                                                                                                                                                                                                                                                                                                                                                                                                                                                                                                                                                                                                                                                                                               | 1,473,385 |
| Cancer                                                                      |  |                                                                                                                                                                                                                                                                                                                                                                                                                                                                                                                                                                                                                                                                                                                                                                                                                                                                                                                                                                                                                                                                                                                                                                                                                                                                                                                            |           |
| 25                                                                          |  | exp Neoplasms/                                                                                                                                                                                                                                                                                                                                                                                                                                                                                                                                                                                                                                                                                                                                                                                                                                                                                                                                                                                                                                                                                                                                                                                                                                                                                                             | 3,685,066 |
| 26                                                                          |  | (neoplas* or cancer* or tumor* or tumour* or malignan* or lymphoma* or neuroblastoma* or nephroblastoma* or carcinoma*).ab,kf,ti.                                                                                                                                                                                                                                                                                                                                                                                                                                                                                                                                                                                                                                                                                                                                                                                                                                                                                                                                                                                                                                                                                                                                                                                          | 3,853,047 |
| 27                                                                          |  | 25 or 26                                                                                                                                                                                                                                                                                                                                                                                                                                                                                                                                                                                                                                                                                                                                                                                                                                                                                                                                                                                                                                                                                                                                                                                                                                                                                                                   | 4,815,549 |
| All diseases/conditions combined with OR                                    |  |                                                                                                                                                                                                                                                                                                                                                                                                                                                                                                                                                                                                                                                                                                                                                                                                                                                                                                                                                                                                                                                                                                                                                                                                                                                                                                                            |           |
| 28                                                                          |  | 15 or 24 or 27                                                                                                                                                                                                                                                                                                                                                                                                                                                                                                                                                                                                                                                                                                                                                                                                                                                                                                                                                                                                                                                                                                                                                                                                                                                                                                             | 6,686,820 |
| Placenta, study types, age groups and diseases/conditions combined with AND |  |                                                                                                                                                                                                                                                                                                                                                                                                                                                                                                                                                                                                                                                                                                                                                                                                                                                                                                                                                                                                                                                                                                                                                                                                                                                                                                                            |           |
| 29                                                                          |  | 3 and 6 and 9 and 28                                                                                                                                                                                                                                                                                                                                                                                                                                                                                                                                                                                                                                                                                                                                                                                                                                                                                                                                                                                                                                                                                                                                                                                                                                                                                                       | 2,603     |
| Fetal programming                                                           |  |                                                                                                                                                                                                                                                                                                                                                                                                                                                                                                                                                                                                                                                                                                                                                                                                                                                                                                                                                                                                                                                                                                                                                                                                                                                                                                                            |           |
| 30                                                                          |  | Prenatal Exposure Delayed Effects/                                                                                                                                                                                                                                                                                                                                                                                                                                                                                                                                                                                                                                                                                                                                                                                                                                                                                                                                                                                                                                                                                                                                                                                                                                                                                         | 32,919    |
| 31                                                                          |  | ("fetal programming*" or "foetal programming*" or "developmental origin? of health and disease*" or "developmental origin? of health and adult disease*" or "Barker?? hypothesis").ab,kf,ti.                                                                                                                                                                                                                                                                                                                                                                                                                                                                                                                                                                                                                                                                                                                                                                                                                                                                                                                                                                                                                                                                                                                               | 3,314     |
| 32                                                                          |  | 30 or 31                                                                                                                                                                                                                                                                                                                                                                                                                                                                                                                                                                                                                                                                                                                                                                                                                                                                                                                                                                                                                                                                                                                                                                                                                                                                                                                   | 35,308    |
| Fetal programming, placenta and study type combined with AND                |  |                                                                                                                                                                                                                                                                                                                                                                                                                                                                                                                                                                                                                                                                                                                                                                                                                                                                                                                                                                                                                                                                                                                                                                                                                                                                                                                            |           |
| 33                                                                          |  | 32 and 3 and 9                                                                                                                                                                                                                                                                                                                                                                                                                                                                                                                                                                                                                                                                                                                                                                                                                                                                                                                                                                                                                                                                                                                                                                                                                                                                                                             | 1,663     |
| Both strategies combined with OR                                            |  |                                                                                                                                                                                                                                                                                                                                                                                                                                                                                                                                                                                                                                                                                                                                                                                                                                                                                                                                                                                                                                                                                                                                                                                                                                                                                                                            |           |
| 34                                                                          |  | 29 or 33                                                                                                                                                                                                                                                                                                                                                                                                                                                                                                                                                                                                                                                                                                                                                                                                                                                                                                                                                                                                                                                                                                                                                                                                                                                                                                                   | 3,798     |
| Limits                                                                      |  |                                                                                                                                                                                                                                                                                                                                                                                                                                                                                                                                                                                                                                                                                                                                                                                                                                                                                                                                                                                                                                                                                                                                                                                                                                                                                                                            |           |
| 35                                                                          |  | (animals/ not humans/) or comment/ or editorial/ or exp review/ or meta analysis/ or consensus/                                                                                                                                                                                                                                                                                                                                                                                                                                                                                                                                                                                                                                                                                                                                                                                                                                                                                                                                                                                                                                                                                                                                                                                                                            | 9,209,370 |
| 36                                                                          |  | 34 not 35                                                                                                                                                                                                                                                                                                                                                                                                                                                                                                                                                                                                                                                                                                                                                                                                                                                                                                                                                                                                                                                                                                                                                                                                                                                                                                                  | 2,341     |
| 37                                                                          |  | limit 36 to english language                                                                                                                                                                                                                                                                                                                                                                                                                                                                                                                                                                                                                                                                                                                                                                                                                                                                                                                                                                                                                                                                                                                                                                                                                                                                                               | 2,242     |
| 38                                                                          |  | limit 37 to yr="2000 - 2023"                                                                                                                                                                                                                                                                                                                                                                                                                                                                                                                                                                                                                                                                                                                                                                                                                                                                                                                                                                                                                                                                                                                                                                                                                                                                                               | 1,968     |

Embase (Embase.com)

Last run May 13, 2022

| Search terms     |                                                                                                                                                                                                                                                                                                                                                                                                                                                                                                                                                                                                                                |  | Number of hits |
|------------------|--------------------------------------------------------------------------------------------------------------------------------------------------------------------------------------------------------------------------------------------------------------------------------------------------------------------------------------------------------------------------------------------------------------------------------------------------------------------------------------------------------------------------------------------------------------------------------------------------------------------------------|--|----------------|
| Placenta         |                                                                                                                                                                                                                                                                                                                                                                                                                                                                                                                                                                                                                                |  |                |
| 1                | 'placenta'/exp OR 'placenta disorder'/exp OR 'pregnancy toxemia'/de OR 'preeclampsia'/de                                                                                                                                                                                                                                                                                                                                                                                                                                                                                                                                       |  | 167,988        |
| 2                | placent*:ti,ab,kw OR 'pre eclampsia':ti,ab,kw OR preeclampsia:ti,ab,kw OR 'pregnancy toxem*':ti,ab,kw OR 'oedema proteinuria hypertension gestosis':ti,ab,kw OR 'edema proteinuria hypertension gestosis':ti,ab,kw OR 'toxemia of pregnancy':ti,ab,kw OR 'eph complex':ti,ab,kw OR 'eph toxemia*':ti,ab,kw OR 'eph gestosis':ti,ab,kw OR chorioamnionit:ti,ab,kw OR amnionitis:ti,ab,kw OR amnionitides:ti,ab,kw OR funisitis:ti,ab,kw OR funisitides:ti,ab,kw                                                                                                                                                                 |  | 189,117        |
| 3                | #1 OR #2                                                                                                                                                                                                                                                                                                                                                                                                                                                                                                                                                                                                                       |  | 233,150        |
| Age groups       |                                                                                                                                                                                                                                                                                                                                                                                                                                                                                                                                                                                                                                |  |                |
| 4                | 'child'/de OR 'infant'/de OR 'high risk infant'/de OR 'adolescent'/de OR 'juvenile'/de                                                                                                                                                                                                                                                                                                                                                                                                                                                                                                                                         |  | 3,483,700      |
| 5                | babies:ti,ab,kw OR baby:ti,ab,kw OR boy:ti,ab,kw OR boys:ti,ab,kw OR child*:ti,ab,kw OR girl*:ti,ab,kw OR infant*:ti,ab,kw OR paediatric*:ti,ab,kw OR pediatric*:ti,ab,kw OR preschool*:ti,ab,kw OR toddler*:ti,ab,kw OR kindergar*en*:ti,ab,kw OR prekindergar*en*:ti,ab,kw OR 'pre k':ti,ab,kw OR offspring:ti,ab,kw OR kid:ti,ab,kw OR kids:ti,ab,kw OR teen*:ti,ab,kw OR youth*:ti,ab,kw OR youngster*:ti,ab,kw OR adolescent*:ti,ab,kw OR adolescence:ti,ab,kw OR juvenile*:ti,ab,kw OR minors:ti,ab,kw                                                                                                                   |  | 3,274,351      |
| 6                | #4 OR #5                                                                                                                                                                                                                                                                                                                                                                                                                                                                                                                                                                                                                       |  | 4,689,111      |
| Study types      |                                                                                                                                                                                                                                                                                                                                                                                                                                                                                                                                                                                                                                |  |                |
| 7                | 'cohort analysis'/de OR 'case control study'/exp OR 'follow up'/de OR 'longitudinal study'/exp OR 'prospective study'/de OR 'retrospective study'/de OR 'epidemiology'/exp                                                                                                                                                                                                                                                                                                                                                                                                                                                     |  | 6,864,943      |
| 8                | cohort*:ti,ab,kw OR incidence:ti,ab,kw OR 'follow up*':ti,ab,kw OR longitudinal:ti,ab,kw OR prospectiv*:ti,ab,kw OR retrospectiv*:ti,ab,kw OR 'case control*':ti,ab,kw OR 'case compar*':ti,ab,kw OR 'case-compeer*':ti,ab,kw OR 'case referrent':ti,ab,kw OR 'case base stud*':ti,ab,kw OR epidemiolog*:ti,ab,kw OR 'odds ratio*':ti,ab,kw OR 'relative risk*':ti,ab,kw OR subcohort*:ti,ab,kw OR 'sub cohort*':ti,ab,kw OR 'long term':ti,ab,kw OR longterm:ti,ab,kw OR registry:ti,ab,kw OR registries:ti,ab,kw OR register*:ti,ab,kw OR 'cross section*':ti,ab,kw OR exposure:ti,ab,kw OR ((panel* NEAR/7 stud*):ti,ab,kw) |  | 8,253,865      |
| 9                | #7 OR #8                                                                                                                                                                                                                                                                                                                                                                                                                                                                                                                                                                                                                       |  | 10,534,011     |
| Hypersensitivity |                                                                                                                                                                                                                                                                                                                                                                                                                                                                                                                                                                                                                                |  |                |
| 10               | 'hypersensitivity'/de OR 'delayed hypersensitivity'/exp OR 'immediate type hypersensitivity'/exp OR 'atopic dermatitis'/de OR 'bronchitis'/exp                                                                                                                                                                                                                                                                                                                                                                                                                                                                                 |  | 593,744        |
| 11               | hypersensitiv*:ti,ab,kw OR allergy:ti,ab,kw OR allergic:ti,ab,kw OR allergies:ti,ab,kw OR 'airway hyper responsive*':ti,ab,kw OR asthma*:ti,ab,kw OR bronchitis:ti,ab,kw OR bronchiolitis:ti,ab,kw OR                                                                                                                                                                                                                                                                                                                                                                                                                          |  | 619,800        |

|                                        |  |                                                                                                                                                                                                                                                                                                                                                                                                                                                                                                                                                                                                                                                                                                                                                                                                                                                                                                                                                                                                                                                                                                                                                                                                                                                                                                                                                                                                                                                                                                                                                                                                              |           |
|----------------------------------------|--|--------------------------------------------------------------------------------------------------------------------------------------------------------------------------------------------------------------------------------------------------------------------------------------------------------------------------------------------------------------------------------------------------------------------------------------------------------------------------------------------------------------------------------------------------------------------------------------------------------------------------------------------------------------------------------------------------------------------------------------------------------------------------------------------------------------------------------------------------------------------------------------------------------------------------------------------------------------------------------------------------------------------------------------------------------------------------------------------------------------------------------------------------------------------------------------------------------------------------------------------------------------------------------------------------------------------------------------------------------------------------------------------------------------------------------------------------------------------------------------------------------------------------------------------------------------------------------------------------------------|-----------|
|                                        |  | wheeze:ti,ab,kw OR 'atopic eczema*':ti,ab,kw OR 'atopic dermatitis':ti,ab,kw                                                                                                                                                                                                                                                                                                                                                                                                                                                                                                                                                                                                                                                                                                                                                                                                                                                                                                                                                                                                                                                                                                                                                                                                                                                                                                                                                                                                                                                                                                                                 |           |
| 12                                     |  | anaphylaxis:ti,ab,kw OR anaphylactic:ti,ab,kw OR anaphylactoid:ti,ab,kw OR 'atopic conjunctiviti*':ti,ab,kw OR 'vernal conjunctiviti*':ti,ab,kw OR 'vernal keratoconjunctiviti*':ti,ab,kw OR 'giant papillary conjunctiviti*':ti,ab,kw OR 'airway hyper-responsiveness':ti,ab,kw OR 'exercise-induced bronchospasm*':ti,ab,kw OR pollinosis:ti,ab,kw OR pollinoses:ti,ab,kw OR 'hay fever':ti,ab,kw OR hayfever:ti,ab,kw OR hives:ti,ab,kw OR angi*edema*:ti,ab,kw OR 'quincke* edema*':ti,ab,kw OR 'quincke* oedema*':ti,ab,kw OR 'angioneurotic edema*':ti,ab,kw OR 'angioneurotic oedema*':ti,ab,kw OR 'c1 inhibitor deficienc*':ti,ab,kw OR 'c1 esterase inhibitor deficienc*':ti,ab,kw OR urticaria*:ti,ab,kw                                                                                                                                                                                                                                                                                                                                                                                                                                                                                                                                                                                                                                                                                                                                                                                                                                                                                           | 89,657    |
| 13                                     |  | (dermatiti* NEAR/2 (photosensitiv* OR photoallerg*)):ti,ab,kw                                                                                                                                                                                                                                                                                                                                                                                                                                                                                                                                                                                                                                                                                                                                                                                                                                                                                                                                                                                                                                                                                                                                                                                                                                                                                                                                                                                                                                                                                                                                                | 592       |
| 14                                     |  | (eosinophilic NEAR/2 (esophagitides OR esophagitis)):ti,ab,kw                                                                                                                                                                                                                                                                                                                                                                                                                                                                                                                                                                                                                                                                                                                                                                                                                                                                                                                                                                                                                                                                                                                                                                                                                                                                                                                                                                                                                                                                                                                                                | 6,466     |
| 15                                     |  | #10 OR #11 OR #12 OR #13 OR #14                                                                                                                                                                                                                                                                                                                                                                                                                                                                                                                                                                                                                                                                                                                                                                                                                                                                                                                                                                                                                                                                                                                                                                                                                                                                                                                                                                                                                                                                                                                                                                              | 832,004   |
| Psychiatric / psychological conditions |  |                                                                                                                                                                                                                                                                                                                                                                                                                                                                                                                                                                                                                                                                                                                                                                                                                                                                                                                                                                                                                                                                                                                                                                                                                                                                                                                                                                                                                                                                                                                                                                                                              |           |
| 16                                     |  | 'mental disease'/de OR 'developmental disorder'/exp OR 'anxiety disorder'/exp OR 'autism'/exp OR 'attention deficit disorder'/de OR 'eating disorder'/exp OR 'mood disorder'/exp OR 'learning disorder'/exp OR 'communication disorder'/exp OR 'schizophrenia spectrum disorder'/exp                                                                                                                                                                                                                                                                                                                                                                                                                                                                                                                                                                                                                                                                                                                                                                                                                                                                                                                                                                                                                                                                                                                                                                                                                                                                                                                         | 1,407,294 |
| 17                                     |  | ((cognitive OR neurocognitive) NEAR/3 (impair* OR dysfunction* OR disorder* OR declin*)):ti,ab,kw                                                                                                                                                                                                                                                                                                                                                                                                                                                                                                                                                                                                                                                                                                                                                                                                                                                                                                                                                                                                                                                                                                                                                                                                                                                                                                                                                                                                                                                                                                            | 209,957   |
| 18                                     |  | (intellectual* NEAR/2 (disabilit* OR disable*)):ti,ab,kw                                                                                                                                                                                                                                                                                                                                                                                                                                                                                                                                                                                                                                                                                                                                                                                                                                                                                                                                                                                                                                                                                                                                                                                                                                                                                                                                                                                                                                                                                                                                                     | 33,052    |
| 19                                     |  | 'mental disorder*':ti,ab,kw OR 'psychiatric illness*':ti,ab,kw OR 'psychiatric disease*':ti,ab,kw OR 'mental illness*':ti,ab,kw OR 'mentally ill':ti,ab,kw OR 'psychiatric disorder*':ti,ab,kw OR 'psychiatric diagnos*':ti,ab,kw OR anxiety*:ti,ab,kw OR neurotic:ti,ab,kw OR neuroses:ti,ab,kw OR neurosis:ti,ab,kw OR psychoneuros*:ti,ab,kw OR 'obsessive compulsive':ti,ab,kw OR 'anankastic personalit*':ti,ab,kw OR hoarding:ti,ab,kw OR hoarder*:ti,ab,kw OR panic*:ti,ab,kw OR phobic:ti,ab,kw OR phobia*:ti,ab,kw OR claustrophobi*:ti,ab,kw OR bipolar*:ti,ab,kw OR 'manic depress*':ti,ab,kw OR 'manic disorder*':ti,ab,kw OR anorexia:ti,ab,kw OR bulimia:ti,ab,kw OR 'avoidant restrictive food intake disorder*':ti,ab,kw OR 'food neophobia*':ti,ab,kw OR arfid:ti,ab,kw OR 'binge eating':ti,ab,kw OR diabulim*:ti,ab,kw OR 'food addict*':ti,ab,kw OR 'compulsive eating':ti,ab,kw OR 'night eating syndrome':ti,ab,kw OR pica:ti,ab,kw OR 'rumination syndrome*':ti,ab,kw OR 'rumination disorder*':ti,ab,kw OR 'mood disorder*':ti,ab,kw OR 'affective disorder*':ti,ab,kw OR depression*:ti,ab,kw OR depressive:ti,ab,kw OR depressed:ti,ab,kw OR cyclothymi*:ti,ab,kw OR neurodevelopment*:ti,ab,kw OR 'behavior disorder*':ti,ab,kw OR 'child development disorder*':ti,ab,kw OR autism:ti,ab,kw OR autist*:ti,ab,kw OR asperger*:ti,ab,kw OR 'communication disorder*':ti,ab,kw OR 'motor skills disorder*':ti,ab,kw OR mutism:ti,ab,kw OR 'reactive attachment disorder':ti,ab,kw OR schizophren*:ti,ab,kw OR 'stereotypic movement disorder*':ti,ab,kw OR 'tic disorder*':ti,ab,kw | 1,409,508 |

|                                                                             |    |                                                                                                                                                                                                                                                                                    |           |
|-----------------------------------------------------------------------------|----|------------------------------------------------------------------------------------------------------------------------------------------------------------------------------------------------------------------------------------------------------------------------------------|-----------|
|                                                                             |    | OR 'affective psychotic disorder':ti,ab,kw OR paranoi*:ti,ab,kw OR 'mental deterioration':ti,ab,kw OR 'internalizing symptom':ti,ab,kw OR 'externalizing symptom':ti,ab,kw OR 'internalizing disorder':ti,ab,kw OR 'negative affect':ti,ab,kw OR 'externalizing disorder':ti,ab,kw |           |
|                                                                             | 20 | ((feeding OR eating OR appetite) NEAR/2 disorder*):ti,ab,kw                                                                                                                                                                                                                        | 34,162    |
|                                                                             | 21 | ((('attention deficit' NEAR/4 disorder*):ti,ab,kw) OR 'disruptive behavioral disorder':ti,ab,kw                                                                                                                                                                                    | 40,760    |
|                                                                             | 22 | (development* NEAR/1 (disabilit* OR disorder* OR deviation*)):ti,ab,kw                                                                                                                                                                                                             | 25,690    |
|                                                                             | 23 | (learning NEAR/1 (disabilit* OR disorder*)):ti,ab,kw                                                                                                                                                                                                                               | 14,111    |
|                                                                             | 24 | #16 OR #17 OR #18 OR #19 OR #20 OR #21 OR #22 OR #23                                                                                                                                                                                                                               | 2,139,096 |
| Cancer                                                                      |    |                                                                                                                                                                                                                                                                                    |           |
|                                                                             | 25 | 'neoplasm'/exp                                                                                                                                                                                                                                                                     | 5,622,017 |
|                                                                             | 26 | neoplas*:ti,ab,kw OR cancer*:ti,ab,kw OR tumor*:ti,ab,kw OR tumour*:ti,ab,kw OR malignan*:ti,ab,kw OR lymphoma*:ti,ab,kw OR neuroblastoma*:ti,ab,kw OR nephroblastoma*:ti,ab,kw OR carcinoma*:ti,ab,kw                                                                             | 5,251,175 |
|                                                                             | 27 | #25 OR #26                                                                                                                                                                                                                                                                         | 6,661,705 |
| All diseases/conditions combined with OR                                    |    |                                                                                                                                                                                                                                                                                    |           |
|                                                                             | 28 | #15 OR #24 OR #27                                                                                                                                                                                                                                                                  | 9,332,358 |
| Placenta, study types, age groups and diseases/conditions combined with AND |    |                                                                                                                                                                                                                                                                                    |           |
|                                                                             | 29 | #3 AND #6 AND #9 AND #28                                                                                                                                                                                                                                                           | 5,247     |
| Fetal programming                                                           |    |                                                                                                                                                                                                                                                                                    |           |
|                                                                             | 30 | 'fetal programming':ti,ab,kw OR 'foetal programming':ti,ab,kw OR 'prenatal programming':ti,ab,kw OR 'developmental origin* of health and disease':ti,ab,kw OR 'developmental origin* of health and adult disease':ti,ab,kw OR 'barker* hypothesis':ti,ab,kw                        | 5,192     |
| Fetal programming, placenta and study type combined with AND                |    |                                                                                                                                                                                                                                                                                    |           |
|                                                                             | 31 | #3 AND #9 AND #30                                                                                                                                                                                                                                                                  | 661       |
| Both strategies combined with OR                                            |    |                                                                                                                                                                                                                                                                                    |           |
|                                                                             | 32 | #29 OR #31                                                                                                                                                                                                                                                                         | 5,774     |
| Limits                                                                      |    |                                                                                                                                                                                                                                                                                    |           |
|                                                                             | 33 | #32 NOT ('conference abstract'/it OR 'conference review'/it OR 'editorial'/it OR 'letter'/it OR 'note'/it OR 'review'/it)                                                                                                                                                          | 3,076     |
|                                                                             | 34 | #33 NOT ([animals]/lim NOT [humans]/lim) AND [english]/lim AND [2000-2022]/py                                                                                                                                                                                                      | 2,419     |
